# Supplementary material for: A Zika virus from America is more efficiently transmitted than an Asian virus by Aedes aegypti mosquitoes from Asia
Source: PubMed Central journal article supplement (PMC5430906; doi:10.1038/s41598-017-01282-6), 2017-04-27
Supplement: 41598_2017_1282_MOESM1_ESM.pdf [file 41598_2017_1282_MOESM1_ESM.pdf]

## SUPPLEMENTARY MATERIAL

### A Zika virus from America is more efficiently transmitted than an Asian virus by *Aedes aegypti* mosquitoes from Asia

*Short title:* Difference in ZIKV transmissibility between American and Asian strains

Julien Pompon<sup>1,2,\*</sup>, Ronald Morales-Vargas<sup>3</sup>, Menchie Manuel<sup>1</sup>, Cheong Huat Tan<sup>4</sup>, Thomas Vial<sup>5</sup>, Jun Hao Tan<sup>1</sup>, October M. Sessions<sup>1</sup>, Pedro da Costa Vasconcelos<sup>6</sup>, Lee Ching Ng<sup>4</sup>, Dorothée Missé<sup>2,\*</sup>

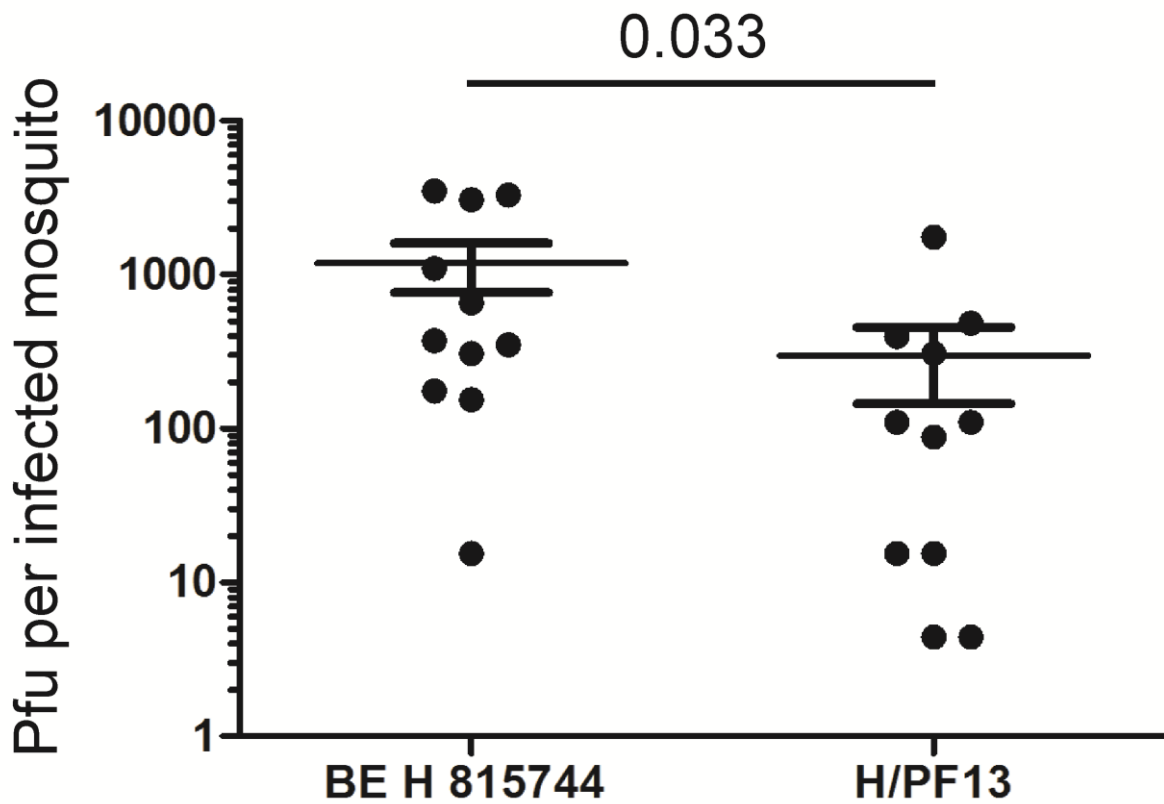

**Figure S1. Virus titer in whole mosquitoes 3 days post-infection with ZIKV from the American (BE H 815744) or Asian (H/PF13) lineage.**

Mosquitoes were orally infected with the two viruses and collected for titration 3 days p.i. Each point represents a mosquito. T-test statistical difference is shown.

**Table S1. Summary of consensus level changes between the virus inoculum and the published KU365780 sequence**

| <b>Position</b> | <b>Reference (KU365780)</b> | <b>Virus inoculum</b> | <b>Amino Acid coding</b> | <b>Codon changed in the virus stock ?</b> |
|-----------------|-----------------------------|-----------------------|--------------------------|-------------------------------------------|
| 836             | C                           | T                     | H                        | no                                        |
| 863             | U                           | C                     | F                        | no                                        |
| 923             | G                           | A                     | T                        | no                                        |
| 1034            | C                           | T                     | T                        | no                                        |
| 1433            | U                           | C                     | I                        | no                                        |
| 1475            | A                           | G                     | K                        | no                                        |
| 1904            | U                           | C                     | T                        | no                                        |
| 3137            | U                           | C                     | H                        | no                                        |
| <b>3534</b>     | <b>A</b>                    | <b>G</b>              | <b>M --&gt; V</b>        | <b>yes</b>                                |
| 3566            | C                           | T                     | D                        | no                                        |
| 5267            | C                           | T                     | R                        | no                                        |
| 5270            | C                           | T                     | T                        | no                                        |
| 5315            | G                           | A                     | E                        | no                                        |
| 5438            | A                           | G                     | R                        | no                                        |
| 6320            | C                           | T                     | N                        | no                                        |
| 6671            | C                           | T                     | F                        | no                                        |
| 6803            | U                           | C                     | F                        | no                                        |
| 6959            | U                           | C                     | H                        | no                                        |
| 6983            | G                           | A                     | G                        | no                                        |
| 7493            | G                           | A                     | G                        | no                                        |
| 8213            | G                           | A                     | K                        | no                                        |
| 8327            | U                           | C                     | Y                        | no                                        |
| 8408            | U                           | A                     | P                        | no                                        |
| <b>8439</b>     | <b>G</b>                    | <b>A</b>              | <b>D --&gt; N</b>        | <b>yes</b>                                |
| 8867            | C                           | T                     | F                        | no                                        |
| 8978            | U                           | C                     | D                        | no                                        |
| 9242            | U                           | C                     | R                        | no                                        |
| 9344            | A                           | G                     | E                        | no                                        |
| 9560            | A                           | G                     | L                        | no                                        |
| 10447           | -                           | C                     | N/A                      | N/A                                       |
| 836             | C                           | T                     | H                        | no                                        |
| 863             | U                           | C                     | F                        | no                                        |
| 923             | G                           | A                     | T                        | no                                        |
| 1034            | C                           | T                     | T                        | no                                        |
| 1433            | U                           | C                     | I                        | no                                        |
| 1475            | A                           | G                     | K                        | no                                        |
| 1904            | U                           | C                     | T                        | no                                        |
| 3137            | U                           | C                     | H                        | no                                        |

|             |          |          |                   |            |
|-------------|----------|----------|-------------------|------------|
| <b>3534</b> | <b>A</b> | <b>G</b> | <b>M --&gt; V</b> | <b>yes</b> |
| 3566        | C        | T        | D                 | no         |
| 5267        | C        | T        | R                 | no         |
| 5270        | C        | T        | T                 | no         |
| 5315        | G        | A        | E                 | no         |
| 5438        | A        | G        | R                 | no         |
| 6320        | C        | T        | N                 | no         |
| 6671        | C        | T        | F                 | no         |
| 6803        | U        | C        | F                 | no         |
| 6959        | U        | C        | H                 | no         |
| 6983        | G        | A        | G                 | no         |
| 7493        | G        | A        | G                 | no         |
| 8213        | G        | A        | K                 | no         |
| 8327        | U        | C        | Y                 | no         |
| 8408        | U        | A        | P                 | no         |
| <b>8439</b> | <b>G</b> | <b>A</b> | <b>D --&gt; N</b> | <b>yes</b> |
| 8867        | C        | T        | F                 | no         |
| 8978        | U        | C        | D                 | no         |
| 9242        | U        | C        | R                 | no         |
| 9344        | A        | G        | E                 | no         |
| 9560        | A        | G        | L                 | no         |
| 10447       | -        | C        | N/A               | N/A        |

---

**Table S2. Analysis of low frequency variants in the viral inoculum**

| <b>Position</b> | <b>Consensus</b> | <b>Variant</b> | <b>Depth of Coverage</b> | <b>Allele frequency</b> |
|-----------------|------------------|----------------|--------------------------|-------------------------|
| 326             | G                | A              | 14572                    | 0.0122                  |
| 436             | T                | C              | 20630                    | 0.0051                  |
| 1028            | T                | G              | 23218                    | 0.0067                  |
| 1278            | T                | C              | 21663                    | 0.0064                  |
| 2400            | T                | C              | 18196                    | 0.0058                  |
| 3147            | A                | G              | 22397                    | 0.0054                  |
| 3535            | T                | C              | 22939                    | 0.0581                  |
| 4106            | A                | G              | 19790                    | 0.0055                  |
| 7416            | A                | G              | 16086                    | 0.0052                  |
| 7499            | T                | C              | 11179                    | 0.0062                  |
| 9227            | A                | G              | 22884                    | 0.0071                  |
| 9434            | A                | G              | 20014                    | 0.0065                  |
| 9548            | T                | C              | 20185                    | 0.0051                  |
| 9917            | C                | A              | 16861                    | 0.0199                  |
| 10220           | T                | C              | 17801                    | 0.0050                  |
| 10666           | T                | A              | 11990                    | 0.0067                  |
| 10717           | A                | G              | 7013                     | 0.0093                  |
| 10772           | A                | G              | 2834                     | 0.0159                  |

**Table S3. Code and origin of the strain used for genome comparison**

| Continent     | Country          | Date of collection | GenBank ID            |          |
|---------------|------------------|--------------------|-----------------------|----------|
| Americas      | Brazil           | 2015               | KU365780 <sup>1</sup> |          |
|               |                  |                    | KX280026              |          |
|               |                  |                    | KU527068              |          |
|               |                  |                    | KU321639              |          |
|               |                  |                    | KU497555              |          |
|               |                  |                    | KX197205              |          |
|               |                  |                    | KU365778              |          |
|               |                  |                    | KX520666              |          |
|               |                  |                    | KR872956              |          |
|               |                  |                    | KU365780              |          |
|               |                  |                    | KU365777              |          |
|               |                  |                    | KU365779              |          |
|               |                  |                    | KU707826              |          |
|               | KU729217         |                    |                       |          |
|               | KU729218         |                    |                       |          |
|               | 2016             |                    | KY014320              |          |
|               |                  |                    | KY014307              |          |
|               |                  |                    | KY014317              |          |
|               |                  |                    | KY014301              |          |
|               |                  |                    | KY014297              |          |
|               |                  |                    | KX197192              |          |
|               |                  |                    | KX811222              |          |
|               |                  |                    | KY014296              |          |
| KU820897      |                  |                    |                       |          |
| KX087102      |                  |                    |                       |          |
| KX548902      |                  |                    |                       |          |
| 2016          |                  | KX247646           |                       |          |
| Ecuador       | 2016             | KX879603           |                       |          |
|               |                  | KX879604           |                       |          |
| French Guiana | 2015             | KU758877           |                       |          |
|               |                  | KU312312           |                       |          |
| Suriname      | 2015             | KU312312           |                       |          |
|               |                  | 2016               | KU937936              |          |
| Venezuela     | 2016             | KX893855           |                       |          |
|               |                  | KX702400           |                       |          |
| Asia          | Cambodia         | 2010               | KU955593              |          |
|               |                  |                    | KX369547 <sup>1</sup> |          |
|               | French Polynesia | 2013               | KX369547 <sup>1</sup> |          |
|               |                  |                    |                       |          |
|               | Philippines      | 2012               | KU681082              |          |
|               |                  |                    |                       |          |
|               | Thailand         | 2013               | KX694532              |          |
|               |                  |                    | 2014                  | KU681081 |
|               |                  |                    | 2016                  | KY272987 |
|               | Singapore        | 2016               | KX827309              |          |
| KX813683      |                  |                    |                       |          |

<sup>1</sup> Virus used in the oral infection study.
